# Supplementary figures and images for: Mild mitochondrial impairment enhances innate immunity and longevity through ATFS‐1 and p38 signaling
Source: PubMed Central journal article supplement — EMBO Rep. 2021 Oct 7;22(12):e52964. doi: 10.15252/embr.202152964 (PMC8647147; doi:10.15252/embr.202152964), 2021-10-07

Source data:

Raw images of Western blots

Figure 4 and Figure 7

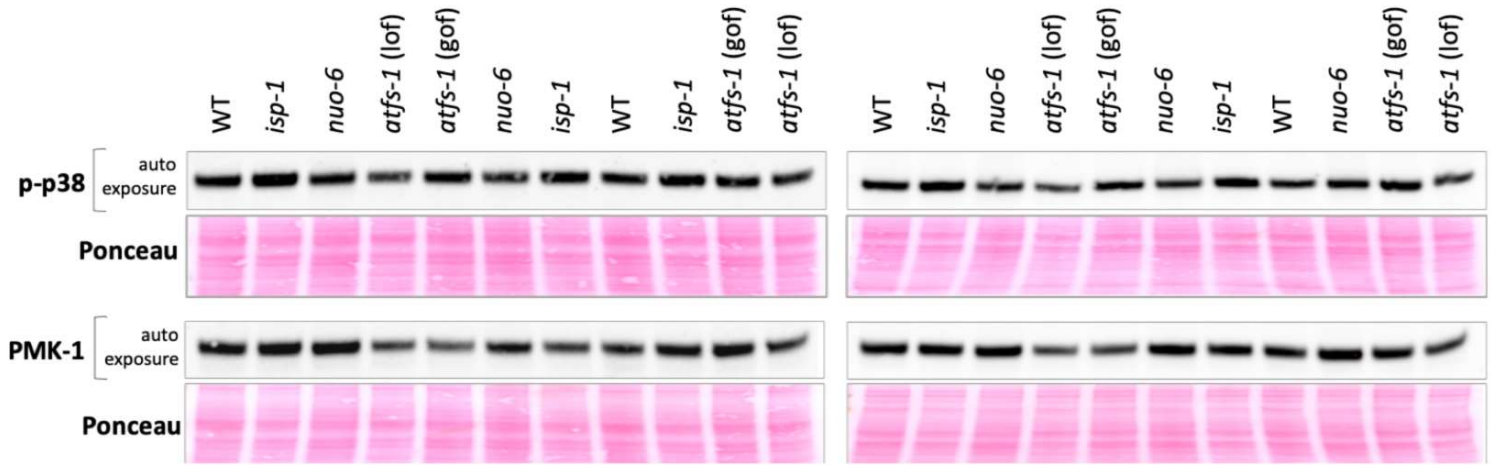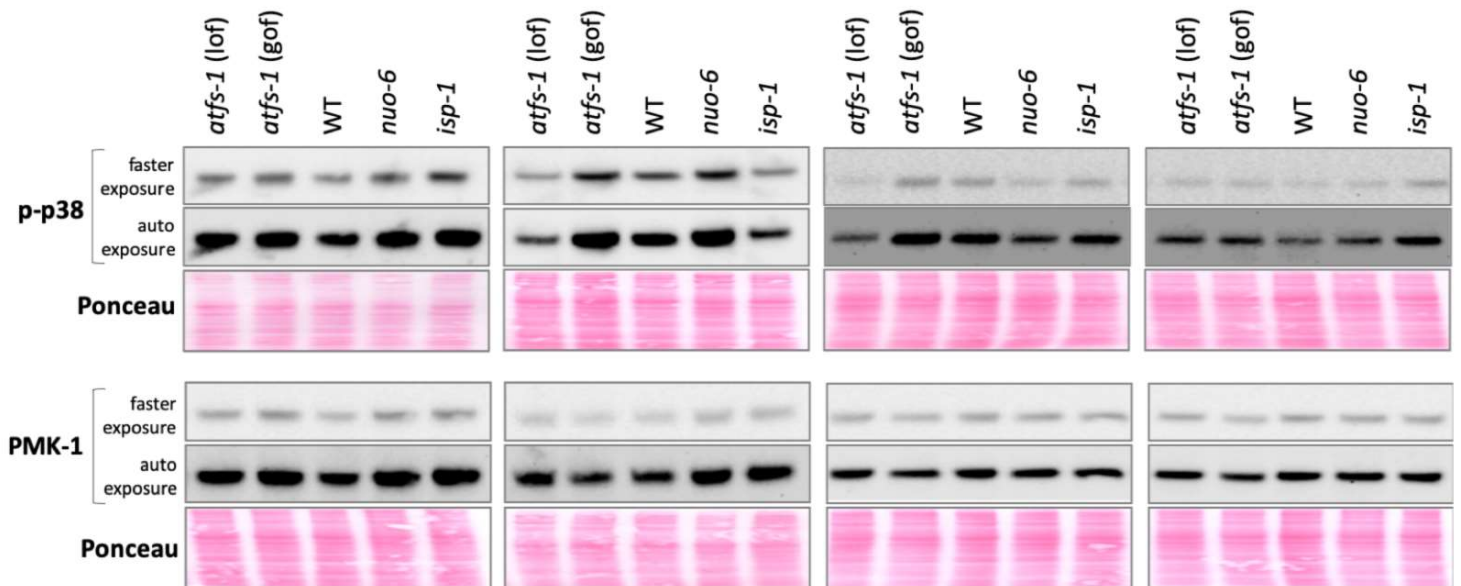

Supplement: EMBR-22-e52964-s007.pdf [file EMBR-22-e52964-s007.pdf]
